# Supplementary material for: Bicycling injury hospitalisation rates in Canadian jurisdictions: analyses examining associations with helmet legislation and mode share
Source: HighWire-hosted journal article supplement (doi:10.1136/bmjopen-2015-008052), 2015-11-01
Supplement: bmjopen-2015-008052supp2.pdf [file bmjopen-2015-008052supp2.pdf]

| Body Region Codes            |                                              |                                          |                                           |                |                                                                                           |
|------------------------------|----------------------------------------------|------------------------------------------|-------------------------------------------|----------------|-------------------------------------------------------------------------------------------|
| Parent Category - Any Injury | Parent Category - Any Brain, Head, Face      | Parent Category - Any Torso, Extremities | Parent Categories - Specific Body Regions | Included Codes | Included Codes Description                                                                |
| Any injury                   | Any brain, head, scalp, skull or face injury |                                          | Brain                                     | S04            | Injury of cranial nerves                                                                  |
| Any injury                   | Any brain, head, scalp, skull or face injury |                                          | Brain                                     | S06            | Intracranial injury                                                                       |
| Any injury                   | Any brain, head, scalp, skull or face injury |                                          | Brain                                     | T06.0          | Injuries of brain and cranial nerve with injuries of nerves and spinal cord at neck level |
| Any injury                   | Any brain, head, scalp, skull or face injury |                                          | Head, scalp or skull                      | S00.0          | Superficial injury of scalp                                                               |
| Any injury                   | Any brain, head, scalp, skull or face injury |                                          | Head, scalp or skull                      | S00.7          | Multiple superficial injuries of head                                                     |
| Any injury                   | Any brain, head, scalp, skull or face injury |                                          | Head, scalp or skull                      | S00.8          | Superficial injury of other parts of head                                                 |
| Any injury                   | Any brain, head, scalp, skull or face injury |                                          | Head, scalp or skull                      | S00.9          | Superficial injury of head, part unspecified                                              |
| Any injury                   | Any brain, head, scalp, skull or face injury |                                          | Head, scalp or skull                      | S01.0          | Open wound of scalp                                                                       |
| Any injury                   | Any brain, head, scalp, skull or face injury |                                          | Head, scalp or skull                      | S01.7          | Multiple open wounds of head                                                              |
| Any injury                   | Any brain, head, scalp, skull or face injury |                                          | Head, scalp or skull                      | S01.8          | Open wounds of other parts of head                                                        |
| Any injury                   | Any brain, head, scalp, skull or face injury |                                          | Head, scalp or skull                      | S01.9          | Open wound of head, part unspecified                                                      |
| Any injury                   | Any brain, head, scalp, skull or face injury |                                          | Head, scalp or skull                      | S02.0          | Fracture of vault of skull                                                                |
| Any injury                   | Any brain, head, scalp, skull or face injury |                                          | Head, scalp or skull                      | S02.1          | Fracture of base of skull                                                                 |
| Any injury                   | Any brain, head, scalp, skull or face injury |                                          | Head, scalp or skull                      | S02.7          | Multiple fractures involving skull and facial bone                                        |
| Any injury                   | Any brain, head, scalp, skull or face injury |                                          | Head, scalp or skull                      | S02.8          | Fractures of other skull and facial bones                                                 |
| Any injury                   | Any brain, head, scalp, skull or face injury |                                          | Head, scalp or skull                      | S02.9          | Fracture of skull and facial bones, part unspecified                                      |
| Any injury                   | Any brain, head, scalp, skull or face injury |                                          | Head, scalp or skull                      | S03.3          | Dislocation of other and unspecified parts of head                                        |
| Any injury                   | Any brain, head, scalp, skull or face injury |                                          | Head, scalp or skull                      | S03.5          | Sprain and strain of joints and ligaments of other and unspecified parts of head          |
| Any injury                   | Any brain, head, scalp, skull or face injury |                                          | Head, scalp or skull                      | S07.1          | Crushing injury of skull                                                                  |
| Any injury                   | Any brain, head, scalp, skull or face injury |                                          | Head, scalp or skull                      | S07.8          | Crushing injury of other parts of head                                                    |
| Any injury                   | Any brain, head, scalp, skull or face injury |                                          | Head, scalp or skull                      | S07.9          | Crushing injury of head, part unspecified                                                 |
| Any injury                   | Any brain, head, scalp, skull or face injury |                                          | Head, scalp or skull                      | S08.0          | Avulsion of scalp                                                                         |
| Any injury                   | Any brain, head, scalp, skull or face injury |                                          | Head, scalp or skull                      | S08.8          | Traumatic amputation of other parts of head                                               |
| Any injury                   | Any brain, head, scalp, skull or face injury |                                          | Head, scalp or skull                      | S08.9          | Traumatic amputation of unspecified part of head                                          |
| Any injury                   | Any brain, head, scalp, skull or face injury |                                          | Head, scalp or skull                      | S09            | Other and unspecified injuries of head                                                    |
| Any injury                   | Any brain, head, scalp, skull or face injury |                                          | Head, scalp or skull                      | T00.0          | Superficial injuries involving head with neck                                             |
| Any injury                   | Any brain, head, scalp, skull or face injury |                                          | Head, scalp or skull                      | T01.0          | Open wound involving head with neck                                                       |
| Any injury                   | Any brain, head, scalp, skull or face injury |                                          | Head, scalp or skull                      | T02.0          | Fractures involving head with neck                                                        |
| Any injury                   | Any brain, head, scalp, skull or face injury |                                          | Head, scalp or skull                      | T04.0          | Crushing injuries involving head with neck                                                |

|            |                                              |  |      |         |                                                                                           |
|------------|----------------------------------------------|--|------|---------|-------------------------------------------------------------------------------------------|
| Any injury | Any brain, head, scalp, skull or face injury |  | Face | S00.1   | Contusion of eyelid and periocular area                                                   |
| Any injury | Any brain, head, scalp, skull or face injury |  | Face | S00.2   | Other superficial injuries of eyelid and periocular area                                  |
| Any injury | Any brain, head, scalp, skull or face injury |  | Face | S00.3   | Superficial injury of nose                                                                |
| Any injury | Any brain, head, scalp, skull or face injury |  | Face | S00.4   | Superficial injury of ear                                                                 |
| Any injury | Any brain, head, scalp, skull or face injury |  | Face | S00.5   | Superficial injury of lip and oral cavity                                                 |
| Any injury | Any brain, head, scalp, skull or face injury |  | Face | S01.1   | Open wound of eyelid and periocular area                                                  |
| Any injury | Any brain, head, scalp, skull or face injury |  | Face | S01.2   | Open wound of nose                                                                        |
| Any injury | Any brain, head, scalp, skull or face injury |  | Face | S01.3   | Open wound of ear                                                                         |
| Any injury | Any brain, head, scalp, skull or face injury |  | Face | S01.4   | Open wound of cheek and temporomandibular area                                            |
| Any injury | Any brain, head, scalp, skull or face injury |  | Face | S01.5   | Open wound of lip and oral cavity                                                         |
| Any injury | Any brain, head, scalp, skull or face injury |  | Face | S02.2   | Fracture of nasal bones                                                                   |
| Any injury | Any brain, head, scalp, skull or face injury |  | Face | S02.3   | Fracture of orbital floor                                                                 |
| Any injury | Any brain, head, scalp, skull or face injury |  | Face | S02.4   | Fracture of malar and maxillary bones                                                     |
| Any injury | Any brain, head, scalp, skull or face injury |  | Face | S02.5   | Fracture of tooth                                                                         |
| Any injury | Any brain, head, scalp, skull or face injury |  | Face | S02.6   | Fracture of mandible                                                                      |
| Any injury | Any brain, head, scalp, skull or face injury |  | Face | S03.0   | Dislocation of jaw                                                                        |
| Any injury | Any brain, head, scalp, skull or face injury |  | Face | S03.1   | Dislocation of septal cartilage of nose                                                   |
| Any injury | Any brain, head, scalp, skull or face injury |  | Face | S03.2   | Dislocation of tooth                                                                      |
| Any injury | Any brain, head, scalp, skull or face injury |  | Face | S03.4   | Sprain and strain of jaw                                                                  |
| Any injury | Any brain, head, scalp, skull or face injury |  | Face | S05     | Injury of eye and orbit                                                                   |
| Any injury | Any brain, head, scalp, skull or face injury |  | Face | S07.0   | Crushing injury of face                                                                   |
| Any injury | Any brain, head, scalp, skull or face injury |  | Face | S08.1   | Traumatic amputation of ear                                                               |
| Any injury | Any brain, head, scalp, skull or face injury |  | Face | T15     | Foreign body on external eye                                                              |
| Any injury | Any brain, head, scalp, skull or face injury |  | Face | T16     | Foreign body in ear                                                                       |
| Any injury |                                              |  | Neck | S10-S19 | Injuries to the neck                                                                      |
| Any injury |                                              |  | Neck | T00.0   | Superficial injuries involving head with neck                                             |
| Any injury |                                              |  | Neck | T01.0   | Open wound involving head with neck                                                       |
| Any injury |                                              |  | Neck | T02.0   | Fractures involving head with neck                                                        |
| Any injury |                                              |  | Neck | T03.0   | Dislocations, sprains and strains involving head with neck                                |
| Any injury |                                              |  | Neck | T04.0   | Crushing injuries involving head with neck                                                |
| Any injury |                                              |  | Neck | T06.0   | Injuries of brain and cranial nerve with injuries of nerves and spinal cord at neck level |

|            |  |                        |                   |         |                                                                                              |
|------------|--|------------------------|-------------------|---------|----------------------------------------------------------------------------------------------|
| Any injury |  | Any torso, extremities | Torso             | S20-S29 | Injuries to the thorax                                                                       |
| Any injury |  | Any torso, extremities | Torso             | S30-S39 | Injuries to the abdomen, lower back, lumbar spine, and pelvis                                |
| Any injury |  | Any torso, extremities | Torso             | T00.1   | Superficial injuries involving thorax with abdomen, lower back, and pelvis                   |
| Any injury |  | Any torso, extremities | Torso             | T01.1   | Open wounds involving thorax with abdomen, lower back and pelvis                             |
| Any injury |  | Any torso, extremities | Torso             | T02.1   | Fractures involving thorax with lower back and pelvis                                        |
| Any injury |  | Any torso, extremities | Torso             | T02.7   | Fractures involving thorax with lower back and pelvis with limbs                             |
| Any injury |  | Any torso, extremities | Torso             | T03.1   | Dislocations, sprains and strains involving thorax with lower back and pelvis                |
| Any injury |  | Any torso, extremities | Torso             | T04.1   | Crushing injuries involving thorax with abdomen, lower back and pelvis                       |
| Any injury |  | Any torso, extremities | Torso             | T04.7   | Crushing injuries of thorax with abdomen, lower back and pelvis with limbs                   |
| Any injury |  | Any torso, extremities | Torso             | T06.5   | Injuries of intrathoracic organs with intra-abdominal and pelvic organs                      |
| Any injury |  | Any torso, extremities | Torso             | T08     | Fracture of spine, level unspecified                                                         |
| Any injury |  | Any torso, extremities | Torso             | T09     | Other injuries of spine and trunk, level unspecified                                         |
| Any injury |  | Any torso, extremities | Torso             | T17     | Foreign body in respiratory tract                                                            |
| Any injury |  | Any torso, extremities | Torso             | T18     | Foreign body in alimentary tract                                                             |
| Any injury |  | Any torso, extremities | Torso             | T19     | Foreign body in genitourinary tract                                                          |
| Any injury |  | Any torso, extremities | Upper extremities | S40-S49 | Injuries to the shoulder and upper arm                                                       |
| Any injury |  | Any torso, extremities | Upper extremities | S50-S59 | Injuries to the elbow and forearm                                                            |
| Any injury |  | Any torso, extremities | Upper extremities | S60-S69 | Injuries to the wrist and hand                                                               |
| Any injury |  | Any torso, extremities | Upper extremities | T00.2   | Superficial injuries involving multiple regions of upper limbs                               |
| Any injury |  | Any torso, extremities | Upper extremities | T00.6   | Superficial injuries involving multiple regions of upper limbs with lower limbs              |
| Any injury |  | Any torso, extremities | Upper extremities | T01.2   | Open wounds involving multiple regions of upper limbs                                        |
| Any injury |  | Any torso, extremities | Upper extremities | T01.6   | Open wounds involving multiple regions of upper limbs with lower limbs                       |
| Any injury |  | Any torso, extremities | Upper extremities | T02.2   | Fractures involving multiple regions of one upper limb                                       |
| Any injury |  | Any torso, extremities | Upper extremities | T02.4   | Fractures involving multiple regions of both upper limbs                                     |
| Any injury |  | Any torso, extremities | Upper extremities | T02.6   | Fractures involving multiple regions of upper limbs with lower limbs                         |
| Any injury |  | Any torso, extremities | Upper extremities | T02.7   | Fractures involving thorax with lower back and pelvis with limbs                             |
| Any injury |  | Any torso, extremities | Upper extremities | T03.2   | Dislocations, sprains and strains involving multiple regions of upper limbs                  |
| Any injury |  | Any torso, extremities | Upper extremities | T03.4   | Dislocations, sprains and strains involving multiple regions of upper limbs with lower limbs |
| Any injury |  | Any torso, extremities | Upper extremities | T04.2   | Crushing injuries involving multiple regions of upper limbs                                  |
| Any injury |  | Any torso, extremities | Upper extremities | T04.4   | Crushing injuries involving multiple regions of upper limbs with lower limbs                 |
| Any injury |  | Any torso, extremities | Upper extremities | T04.7   | Crushing injuries of thorax with abdomen, lower back and pelvis with limbs                   |

|            |  |                        |                   |         |                                                                                              |
|------------|--|------------------------|-------------------|---------|----------------------------------------------------------------------------------------------|
| Any injury |  | Any torso, extremities | Upper extremities | T05.0   | Traumatic amputation of both hands                                                           |
| Any injury |  | Any torso, extremities | Upper extremities | T05.1   | Traumatic amputation of one hand and other arm [any level, except hand]                      |
| Any injury |  | Any torso, extremities | Upper extremities | T05.2   | Traumatic amputation of both arms [any level]                                                |
| Any injury |  | Any torso, extremities | Upper extremities | T05.6   | Traumatic amputation of upper and lower limbs, any combination [any level]                   |
| Any injury |  | Any torso, extremities | Upper extremities | T10     | Fracture of upper limb, level unspecified                                                    |
| Any injury |  | Any torso, extremities | Upper extremities | T11     | Other injuries of upper limb, level unspecified                                              |
| Any injury |  | Any torso, extremities | Lower Extremities | S70-S79 | Injuries to the hip and thigh                                                                |
| Any injury |  | Any torso, extremities | Lower Extremities | S80-S89 | Injuries to the knee and lower leg                                                           |
| Any injury |  | Any torso, extremities | Lower Extremities | S90-S99 | Injuries to the ankle and foot                                                               |
| Any injury |  | Any torso, extremities | Lower Extremities | T00.3   | Superficial injuries involving multiple regions of lower limbs                               |
| Any injury |  | Any torso, extremities | Lower Extremities | T00.6   | Superficial injuries involving multiple regions of upper limbs with lower limbs              |
| Any injury |  | Any torso, extremities | Lower Extremities | T01.3   | Open wounds of multiple regions of lower limbs                                               |
| Any injury |  | Any torso, extremities | Lower Extremities | T01.6   | Open wounds involving multiple regions of upper limbs with lower limbs                       |
| Any injury |  | Any torso, extremities | Lower Extremities | T02.3   | Fractures involving multiple regions of one lower limb                                       |
| Any injury |  | Any torso, extremities | Lower Extremities | T02.5   | Fractures involving multiple regions of both lower limbs                                     |
| Any injury |  | Any torso, extremities | Lower Extremities | T02.6   | Fractures involving multiple regions of upper limbs with lower limbs                         |
| Any injury |  | Any torso, extremities | Lower Extremities | T02.7   | Fractures involving thorax with lower back and pelvis with limbs                             |
| Any injury |  | Any torso, extremities | Lower Extremities | T03.3   | Dislocations, sprains and strains involving multiple regions of lower limbs                  |
| Any injury |  | Any torso, extremities | Lower Extremities | T03.4   | Dislocations, sprains and strains involving multiple regions of upper limbs with lower limbs |
| Any injury |  | Any torso, extremities | Lower Extremities | T04.3   | Crushing injuries involving multiple regions of lower limbs                                  |
| Any injury |  | Any torso, extremities | Lower Extremities | T04.4   | Crushing injuries involving multiple regions of upper limbs with lower limbs                 |
| Any injury |  | Any torso, extremities | Lower Extremities | T04.7   | Crushing injuries of thorax with abdomen, lower back and pelvis with limbs                   |
| Any injury |  | Any torso, extremities | Lower Extremities | T05.3   | Traumatic amputation of both feet                                                            |
| Any injury |  | Any torso, extremities | Lower Extremities | T05.4   | Traumatic amputation of one foot and other leg [any level, except foot]                      |
| Any injury |  | Any torso, extremities | Lower Extremities | T05.5   | Traumatic amputation of both legs [any level]                                                |
| Any injury |  | Any torso, extremities | Lower Extremities | T05.6   | Traumatic amputation of upper and lower limbs, any combination [any level]                   |
| Any injury |  | Any torso, extremities | Lower Extremities | T12     | Fracture of lower limb, level unspecified                                                    |
| Any injury |  | Any torso, extremities | Lower Extremities | T13     | Other injuries of lower limb, level unspecified                                              |
| Any injury |  |                        |                   | T00.8   | Superficial injuries involving other combinations of body regions                            |
| Any injury |  |                        |                   | T00.9   | Multiple superficial injuries, unspecified                                                   |
| Any injury |  |                        |                   | T01.8   | Open wounds involving other combinations of body regions                                     |

|            |  |  |  |       |                                                                                |
|------------|--|--|--|-------|--------------------------------------------------------------------------------|
| Any injury |  |  |  | T01.9 | Multiple open wounds of unspecified site                                       |
| Any injury |  |  |  | T02.8 | Fractures involving other combinations of body regions                         |
| Any injury |  |  |  | T02.9 | Multiple fractures, unspecified                                                |
| Any injury |  |  |  | T03.8 | Dislocations, sprains and strains involving other combinations of body regions |
| Any injury |  |  |  | T03.9 | Multiple dislocations, sprains and strains, unspecified                        |
| Any injury |  |  |  | T04.8 | Crushing injuries involving other combinations of body regions                 |
| Any injury |  |  |  | T04.9 | Multiple crushing injuries, unspecified                                        |
| Any injury |  |  |  | T05.8 | Traumatic amputations involving other combinations of body regions             |
| Any injury |  |  |  | T05.9 | Multiple traumatic amputations, unspecified                                    |
| Any injury |  |  |  | T06.1 | Injuries of nerves and spinal cord involving multiple body regions             |
| Any injury |  |  |  | T06.2 | Injuries of nerves involving multiple body regions                             |
| Any injury |  |  |  | T06.3 | Injuries of blood vessels involving multiple body regions                      |
| Any injury |  |  |  | T06.4 | Injuries of muscles and tendons involving multiple body regions                |
| Any injury |  |  |  | T06.8 | Other specified injuries involving multiple body regions                       |
| Any injury |  |  |  | T07   | Unspecified multiple injuries                                                  |
| Any injury |  |  |  | T14   | Injury of unspecified body region                                              |
